# Supplementary material for: Genome-Wide Patterns of Adaptation to Temperate Environments Associated with Transposable Elements in Drosophila
Source: PLoS Genet. 2010 Apr 8;6(4):e1000905. doi: 10.1371/journal.pgen.1000905 (PMC2851572; doi:10.1371/journal.pgen.1000905)
Supplement: Table S2 — Selection coefficient estimates. (0.02 MB XLS) [file pgen.1000905.s002.xls]

## Sheet: Table S4
Table S2. Selection coefficients estimates
Family	Number of TEs	Ns	Ns_low	Ns_up
Doc	32	-35.1	-65.6	-19.4
F-element	21	-21.8	-43	-11
jockey	47	-18.2	-27.4	-11.8
Rt1a	6	-6.1	-18	-1.6
pogo	22	-7.7	-13.7	-4.3
Rt1b	12	-3.3	-5.8	-1.3
1731	1	-0.1	-10.8	NDa
Bari1	3	-1.9	-5.3	ND
hopper	4	-1	-4.3	ND
X-element	5	0	-3	ND
invader4	2	17	-2	ND
S-element	12	287.7	12.5	ND
1360	15	-1.3	-2.9	1.2
BS	17	-0.6	-2.4	2.5
Maximum likelihood estimates of selection coefficient for the 14 families represented in our dataset. Confidence intervals (Ns_low and Ns_up) are also given.
aNot Determined (likelihood curves were not sufficiently "peaked" to specify the particular bound of the confidence interval)
